# Supplementary material
Source: Springer Nature journal article supplement (https://www.springermedizin.de/resource/supplementary/12889_2012_5234_MOESM1_ESM.pdf/9494854)
Supplement: MOESM1 [file 9494854]

## Community level Factors

Cluster type  
Region  
Mean maternal education in the cluster  
Mean paternal education in the cluster  
Mean household wealth index in the cluster  
Mean number of antenatal care visits in the cluster  
Percentage of newborns receiving postnatal care in the cluster

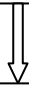

## Socio-economic status

Maternal marital status, religion, education and occupation  
Paternal education, occupation and age when married  
Household wealth index

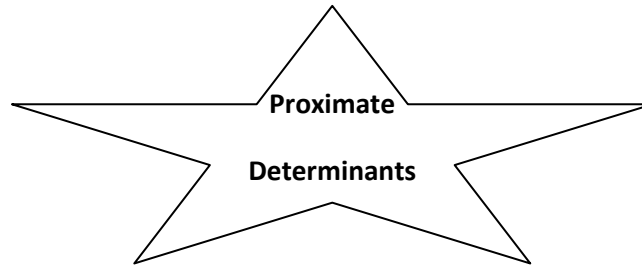

### Maternal factors

Age  
Parity

### Neonatal factors

Sex  
Birth size  
Birth rank and  
birth interval

### Pre-delivery factors

Desire for pregnancy  
Antenatal care  
Pregnancy complications

### Delivery factors

Delivery assistance  
Delivery complications  
Mode of delivery  
Place of delivery

### Post-delivery factors

Postnatal care
